# Supplementary material for: Mid-life epigenetic age, neuroimaging brain age, and cognitive function: coronary artery risk development in young adults (CARDIA) study
Source: publisher site journal article supplement (doi:10.18632/aging.203918), 2022-02-27
Supplement: Supplementary file [file aging-v14i4-203918-supplementary-material-SD3.pdf]

**SUPPLEMENTARY TABLES**

**Supplementary Table 1. Associations between IEAA, EEAA, and PhenoAA vs. cognitive function.**

| Analysis type                                                                         | Epigenetic aging marker | Stroop test               |       |                      | RAVLT-long delay free recall |       |                      | DSST                      |       |                      |
|---------------------------------------------------------------------------------------|-------------------------|---------------------------|-------|----------------------|------------------------------|-------|----------------------|---------------------------|-------|----------------------|
|                                                                                       |                         | Coefficient (95% CI)      | p     | Adj.p <sup>1</sup> n | Coefficient (95% CI)         | p     | Adj.p <sup>1</sup> n | Coefficient (95% CI)      | p     | Adj.p <sup>1</sup> n |
| 5-year prospective analysis <sup>2</sup><br>(Y20 epigenetic aging vs. Y25 Cognition)  | IEAA                    | 0.027<br>(-0.112, 0.166)  | 0.701 | 0.943 920            | 0.001<br>(-0.038, 0.041)     | 0.943 | 0.943 927            | 0.066<br>(-0.126, 0.259)  | 0.498 | 0.943 926            |
|                                                                                       | EEAA                    | 0.060<br>(-0.067, 0.186)  | 0.357 | 0.453 923            | -0.014<br>(-0.049, 0.022)    | 0.453 | 0.453 930            | -0.140<br>(-0.315, 0.034) | 0.115 | 0.345 929            |
|                                                                                       | PhenoAA                 | -0.013<br>(-0.115, 0.088) | 0.795 | 0.795 924            | -0.018<br>(-0.046, 0.011)    | 0.220 | 0.330 931            | -0.157<br>(-0.297,-0.018) | 0.027 | 0.082 930            |
| 15-year prospective analysis <sup>2</sup><br>(Y15 epigenetic aging vs. Y30 Cognition) | IEAA                    | 0.031<br>(-0.128, 0.191)  | 0.700 | 0.700 888            | 0.025<br>(-0.017, 0.067)     | 0.248 | 0.470 903            | -0.107<br>(-0.314, 0.101) | 0.313 | 0.470 904            |
|                                                                                       | EEAA                    | 0.006<br>(-0.129, 0.142)  | 0.926 | 0.926 890            | 0.005<br>(-0.031, 0.041)     | 0.795 | 0.926 905            | -0.094<br>(-0.269, 0.082) | 0.294 | 0.883 906            |
|                                                                                       | PhenoAA                 | 0.062<br>(-0.054, 0.178)  | 0.298 | 0.437 890            | -0.012<br>(-0.043, 0.019)    | 0.437 | 0.437 905            | -0.087<br>(-0.237, 0.062) | 0.253 | 0.437 906            |

<sup>1</sup>BH-FDR adjustment was applied to account for multiple testing for each aging marker across all the cognitive function tests.

<sup>2</sup>Multiple linear regression models adjusting for age, sex, race, study fields, and education.

**Supplementary Table 2. Associations between a five-year change of epigenetic age (Y15-Y20) and brain age (Y25-Y30) vs. cognitive function at Y30.**

| Aging marker                             | Stroop test (Y30)        |       |                      | RAVLT-long delay free recall (Y30) |       |                      | DSST (Y30)                |       |                      |
|------------------------------------------|--------------------------|-------|----------------------|------------------------------------|-------|----------------------|---------------------------|-------|----------------------|
|                                          | Coefficient (95% CI)     | p     | Adj.p <sup>1</sup> n | Coefficient (95% CI)               | p     | Adj.p <sup>1</sup> n | Coefficient (95% CI)      | p     | Adj.p <sup>1</sup> n |
| Horvath’s epigenetic age (5-year change) | 0.097<br>(-0.041, 0.235) | 0.169 | 0.169 757            | 0.028<br>(-0.011, 0.066)           | 0.161 | 0.169 768            | 0.162<br>(-0.028, 0.352)  | 0.094 | 0.169 770            |
| Hannum’s epigenetic age (5-year change)  | 0.098<br>(-0.071, 0.266) | 0.255 | 0.395 758            | 0.026<br>(-0.021, 0.073)           | 0.273 | 0.395 769            | 0.100<br>(-0.130, 0.329)  | 0.395 | 0.395 771            |
| PhenoAge (5-year change)                 | 0.008<br>(-0.100, 0.116) | 0.887 | 0.887 759            | 0.003<br>(-0.027, 0.033)           | 0.832 | 0.887 770            | -0.060<br>(-0.208, 0.088) | 0.429 | 0.887 772            |
| GrimAge (5-year change)                  | 0.106<br>(-0.084, 0.296) | 0.276 | 0.423 759            | 0.006<br>(-0.047, 0.058)           | 0.836 | 0.836 770            | 0.144<br>(-0.118, 0.406)  | 0.282 | 0.423 772            |
| SPARE-BA (5-year change)                 | 0.478<br>(0.186,0.770)   | 0.001 | <b>0.004</b> 469     | -0.017<br>(-0.101, 0.068)          | 0.701 | 0.701 474            | -0.454<br>(-0.843,-0.066) | 0.022 | <b>0.033</b> 475     |

Note: Since the changes of the aging marker over time were evaluated, the age estimates rather than the age acceleration were used.

<sup>1</sup>BH-FDR adjustment was applied to account for multiple testing for each aging marker across all the cognitive function tests.

<sup>2</sup>Multiple linear regression models adjusting for age, sex, race, study fields, and education.

**Supplementary Table 3. Associations between GrimAge acceleration and SPARE-brain age acceleration vs. cognitive function by sex.**

| Analysis type                                                                               |                                      | Stroop test               |              |                    |     | RAVLT long delay recall   |       |                    |     | DSST                      |        |                    |     |
|---------------------------------------------------------------------------------------------|--------------------------------------|---------------------------|--------------|--------------------|-----|---------------------------|-------|--------------------|-----|---------------------------|--------|--------------------|-----|
|                                                                                             |                                      | Coefficient<br>(95% CI)   | p            | Adj.p <sup>1</sup> | n   | Coefficient<br>(95% CI)   | p     | Adj.p <sup>1</sup> | n   | Coefficient<br>(95% CI)   | p      | Adj.p <sup>1</sup> | n   |
| <b>5-year prospective analysis<sup>2</sup></b><br>(Y20 epigenetic aging vs. Y25 Cognition)  | <b>Women</b>                         | 0.187<br>(-0.011, 0.384)  | 0.065        | 0.097              | 470 | -0.036<br>(-0.092, 0.019) | 0.201 | 0.201              | 473 | -0.341<br>(-0.623,-0.059) | 0.018  | 0.055              | 474 |
|                                                                                             | <b>Men</b>                           | 0.196<br>(-0.016, 0.407)  | 0.070        | 0.071              | 455 | -0.056<br>(-0.116, 0.005) | 0.071 | 0.071              | 459 | -0.292<br>(-0.569,-0.015) | 0.039  | 0.071              | 457 |
|                                                                                             | <i>Interaction Adj.p<sup>1</sup></i> |                           | 0.808        |                    |     |                           | 0.808 |                    |     |                           | 0.808  |                    |     |
| <b>15-year prospective analysis<sup>2</sup></b><br>(Y15 epigenetic aging vs. Y30 Cognition) | <b>Women</b>                         | 0.427<br>(0.204,0.651)    | <0.001       | <b>&lt;0.001</b>   | 461 | -0.051<br>(-0.110, 0.007) | 0.087 | 0.087              | 462 | -0.608<br>(-0.928,-0.288) | <0.001 | <b>&lt;0.001</b>   | 466 |
|                                                                                             | <b>Men</b>                           | 0.042<br>(-0.195, 0.279)  | 0.731        | 0.731              | 429 | -0.043<br>(-0.106, 0.021) | 0.189 | 0.284              | 443 | -0.235<br>(-0.505, 0.036) | 0.090  | 0.269              | 440 |
|                                                                                             | <i>Interaction Adj.p<sup>1</sup></i> |                           | <b>0.056</b> |                    |     |                           | 0.723 |                    |     | <b>0.091</b>              |        |                    |     |
| <b>Cross-sectional analyses<sup>2</sup></b><br>(Y25 SPARE-BAA vs. Y25 Cognition)            | <b>Women</b>                         | 0.154<br>(0.025,0.284)    | 0.020        | <b>0.030</b>       | 367 | -0.036<br>(-0.078, 0.006) | 0.098 | 0.098              | 366 | -0.258<br>(-0.470,-0.046) | 0.017  | <b>0.030</b>       | 369 |
|                                                                                             | <b>Men</b>                           | -0.050<br>(-0.196, 0.096) | 0.505        | 0.505              | 337 | -0.042<br>(-0.090, 0.005) | 0.081 | 0.122              | 338 | -0.234<br>(-0.441,-0.027) | 0.027  | 0.082              | 338 |
|                                                                                             | <i>Interaction Adj.p<sup>1</sup></i> |                           | 0.108        |                    |     |                           | 0.820 |                    |     | 0.820                     |        |                    |     |
| <b>Cross-sectional analyses<sup>2</sup></b><br>(Y30 SPARE- BAA vs. Y30 Cognition)           | <b>Women</b>                         | 0.158<br>(0.016,0.299)    | 0.029        | <b>0.044</b>       | 324 | -0.019<br>(-0.065, 0.027) | 0.411 | 0.411              | 322 | -0.323<br>(-0.565,-0.081) | 0.009  | <b>0.028</b>       | 324 |
|                                                                                             | <b>Men</b>                           | 0.424<br>(0.214,0.633)    | <0.001       | <b>&lt;0.001</b>   | 291 | -0.072<br>(-0.127,-0.016) | 0.012 | 0.012              | 298 | -0.610<br>(-0.819,-0.400) | <0.001 | <b>&lt;0.001</b>   | 299 |
|                                                                                             | <i>Interaction Adj.p<sup>1</sup></i> |                           | 0.105        |                    |     |                           | 0.139 |                    |     | 0.105                     |        |                    |     |
| <b>Prospective analyses<sup>2</sup></b><br>(Y25 SPARE- BAA vs. Y30 Cognition)               | <b>Women</b>                         | 0.176<br>(0.027,0.326)    | 0.022        | <b>0.032</b>       | 345 | -0.038<br>(-0.085, 0.008) | 0.107 | 0.107              | 344 | -0.317<br>(-0.556,-0.079) | 0.010  | <b>0.029</b>       | 346 |
|                                                                                             | <b>Men</b>                           | 0.141<br>(-0.076, 0.359)  | 0.203        | 0.305              | 285 | -0.027<br>(-0.083, 0.029) | 0.346 | 0.346              | 297 | -0.273<br>(-0.493,-0.052) | 0.016  | 0.049              | 298 |
|                                                                                             | <i>Interaction Adj.p<sup>1</sup></i> |                           | 0.960        |                    |     |                           | 0.960 |                    |     | 0.960                     |        |                    |     |

<sup>1</sup>BH-FDR adjustment was applied to account for multiple testing for each aging marker across all the cognitive function tests.

<sup>2</sup>Multiple linear regression models adjusting for age, race, study fields, and education.

**Supplementary Table 4. Associations between GrimAge acceleration and SPARE-brain age acceleration vs. cognitive function by *APOE* genotype (*APOE* 3/3 non-carrier vs. *APOE* 4/3 or 4/4 carrier).**

| Analysis type                                                                         |                                  | Stroop test               |        |                    |     | RAVLT long delay recall   |       |                    |     | DSST                      |        |                    |     |
|---------------------------------------------------------------------------------------|----------------------------------|---------------------------|--------|--------------------|-----|---------------------------|-------|--------------------|-----|---------------------------|--------|--------------------|-----|
|                                                                                       |                                  | Coefficient<br>(95% CI)   | p      | Adj.p <sup>1</sup> | n   | Coefficient<br>(95% CI)   | p     | Adj.p <sup>1</sup> | n   | Coefficient<br>(95% CI)   | p      | Adj.p <sup>1</sup> | n   |
| 5-year prospective analysis <sup>2</sup><br>(Y20 epigenetic aging vs. Y25 Cognition)  | <i>APOE</i> 3/3 (Non-carrier)    | 0.280<br>(0.079,0.482)    | 0.007  | <b>0.019</b>       | 470 | -0.053<br>(-0.112, 0.006) | 0.081 | 0.081              | 474 | -0.364<br>(-0.650,-0.078) | 0.013  | <b>0.019</b>       | 470 |
|                                                                                       | <i>APOE</i> 4/3 or 4/4 (Carrier) | 0.055<br>(-0.239, 0.348)  | 0.716  | 0.957              | 216 | -0.002<br>(-0.084, 0.080) | 0.957 | 0.957              | 216 | -0.260<br>(-0.654, 0.135) | 0.198  | 0.595              | 217 |
|                                                                                       | Interaction Adj.p <sup>1</sup>   |                           | 0.248  |                    |     |                           | 0.390 |                    |     |                           | 0.784  |                    |     |
| 15-year prospective analysis <sup>2</sup><br>(Y15 epigenetic aging vs. Y30 Cognition) | <i>APOE</i> 3/3 (Non-carrier)    | 0.224<br>(0.028,0.419)    | 0.025  | <b>0.038</b>       | 451 | -0.013<br>(-0.075, 0.049) | 0.672 | 0.672              | 455 | -0.363<br>(-0.665,-0.060) | 0.019  | <b>0.038</b>       | 455 |
|                                                                                       | <i>APOE</i> 4/3 or 4/4 (Carrier) | -0.039<br>(-0.407, 0.329) | 0.836  | 0.836              | 217 | -0.054<br>(-0.138, 0.030) | 0.211 | 0.316              | 221 | -0.445<br>(-0.860,-0.030) | 0.037  | 0.111              | 221 |
|                                                                                       | Interaction Adj.p <sup>1</sup>   |                           | 0.374  |                    |     |                           | 0.833 |                    |     |                           | 0.833  |                    |     |
| Cross-sectional analyses <sup>2</sup><br>(Y25 SPARE-BAA vs. Y25 Cognition)            | <i>APOE</i> 3/3 (Non-carrier)    | -0.066<br>(-0.186, 0.055) | 0.285  | 0.285              | 358 | -0.032<br>(-0.078, 0.014) | 0.176 | 0.263              | 358 | -0.185<br>(-0.409, 0.039) | 0.107  | 0.263              | 359 |
|                                                                                       | <i>APOE</i> 4/3 or 4/4 (Carrier) | 0.164<br>(-0.036, 0.363)  | 0.110  | 0.165              | 174 | -0.042<br>(-0.104, 0.019) | 0.179 | 0.179              | 174 | -0.362<br>(-0.657,-0.068) | 0.017  | 0.051              | 174 |
|                                                                                       | Interaction Adj.p <sup>1</sup>   |                           | 0.050  |                    |     |                           | 0.636 |                    |     |                           | 0.560  |                    |     |
| Cross-sectional analyses <sup>2</sup><br>(Y30 SPARE- BAA vs. Y30 Cognition)           | <i>APOE</i> 3/3 (Non-carrier)    | 0.319<br>(0.146,0.493)    | <0.001 | <b>0.001</b>       | 318 | -0.019<br>(-0.073, 0.036) | 0.502 | 0.502              | 318 | -0.514<br>(-0.767,-0.261) | <0.001 | <b>&lt;0.001</b>   | 319 |
|                                                                                       | <i>APOE</i> 4/3 or 4/4 (Carrier) | 0.370<br>(0.133,0.607)    | 0.003  | <b>0.003</b>       | 160 | -0.108<br>(-0.169,-0.048) | 0.001 | <b>0.001</b>       | 161 | -0.582<br>(-0.836,-0.329) | <0.001 | <b>&lt;0.001</b>   | 163 |
|                                                                                       | Interaction Adj.p <sup>1</sup>   |                           | 0.721  |                    |     |                           | 0.118 |                    |     |                           | 0.721  |                    |     |
| Prospective analyses <sup>2</sup><br>(Y25 SPARE- BAA vs. Y30 Cognition)               | <i>APOE</i> 3/3 (Non-carrier)    | 0.167<br>(0.000,0.333)    | 0.051  | 0.076              | 323 | -0.020<br>(-0.070, 0.031) | 0.449 | 0.449              | 328 | -0.312<br>(-0.546,-0.078) | 0.010  | <b>0.029</b>       | 329 |
|                                                                                       | <i>APOE</i> 4/3 or 4/4 (Carrier) | 0.207<br>(-0.048, 0.462)  | 0.113  | 0.113              | 156 | -0.066<br>(-0.140, 0.008) | 0.082 | 0.113              | 157 | -0.283<br>(-0.622, 0.055) | 0.103  | 0.113              | 158 |
|                                                                                       | Interaction Adj.p <sup>1</sup>   |                           | 0.839  |                    |     |                           | 0.732 |                    |     |                           | 0.883  |                    |     |

<sup>1</sup>BH-FDR adjustment was applied to account for multiple testing for each aging marker across all the cognitive function tests.

<sup>2</sup>Multiple linear regression models adjusting for age, sex, race, study fields, and education.
